# Supplementary material
Source: PubMed Central journal article supplement (PMC5460841)
Supplement: en.2016-1809.sf1.pdf [file en.2016-1809.sf1.pdf]

# Supplemental Information

## Supplemental Figures

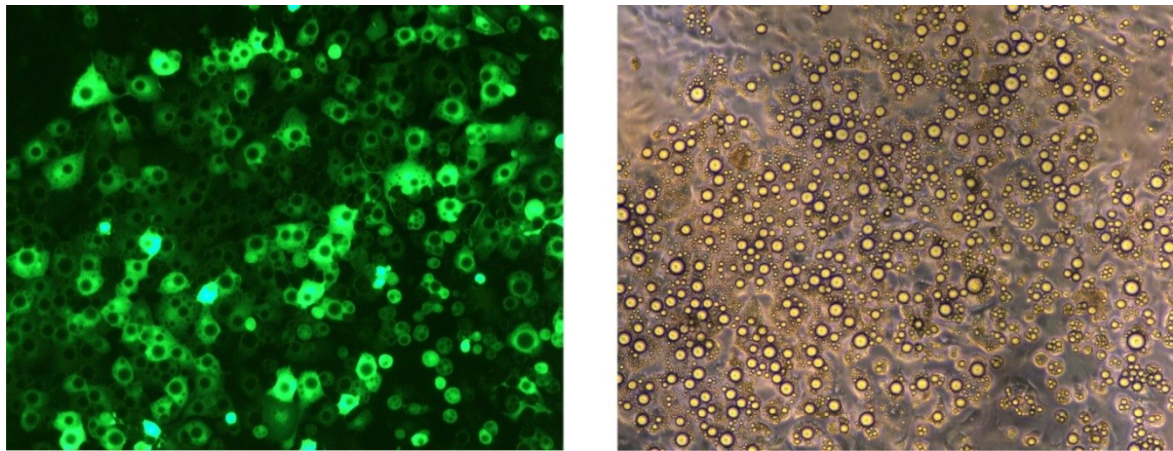

**Supplemental Figure 1.** Fluorescence microscopy (left) and light (phase-contrast) microscopy of differentiated 3T3-L1 adipocytes (day 9) transduced with AV-*Gfp*.

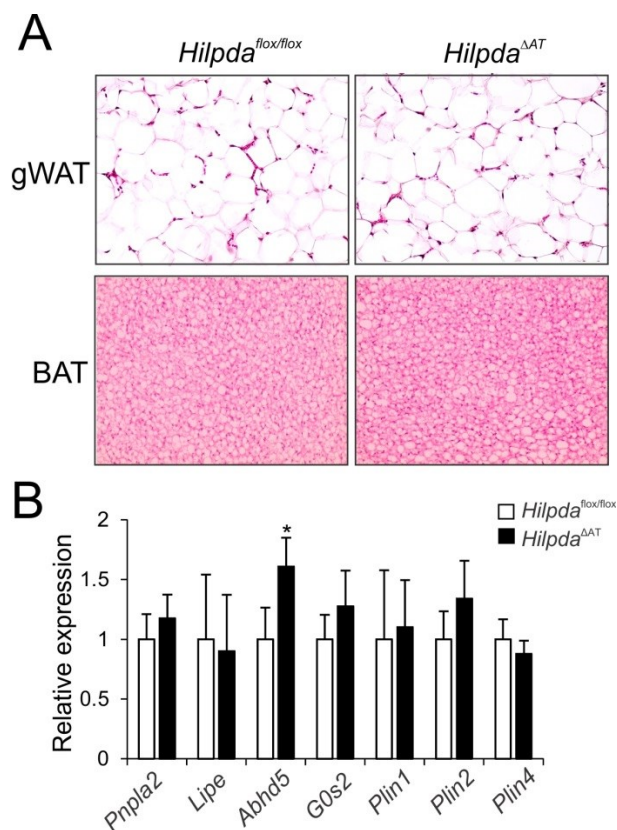

**Supplemental Figure 2.** (A) Representative H&E stainings of epididymal WAT and BAT of male *Hilpda*<sup>flx/flx</sup> (n=6) and *Hilpda*<sup>ΔAT</sup> (n=8) fasted for 24h. (B) mRNA levels of genes involved in lipolysis or lipid droplet morphology (*Pnpla2*, *Lipe*, *Abhd5*, *G0s2*, *Plin1*, *Plin2*, *Plin4*) BAT of *Hilpda*<sup>flx/flx</sup> (n=6) and *Hilpda*<sup>ΔAT</sup> (n=8) mice fasted for 24h. Gene expression levels for *Hilpda*<sup>flx/flx</sup> mice were set at 1 for each gene. Data are mean ± SEM. Asterisks indicate significantly different according to Student's t-test.

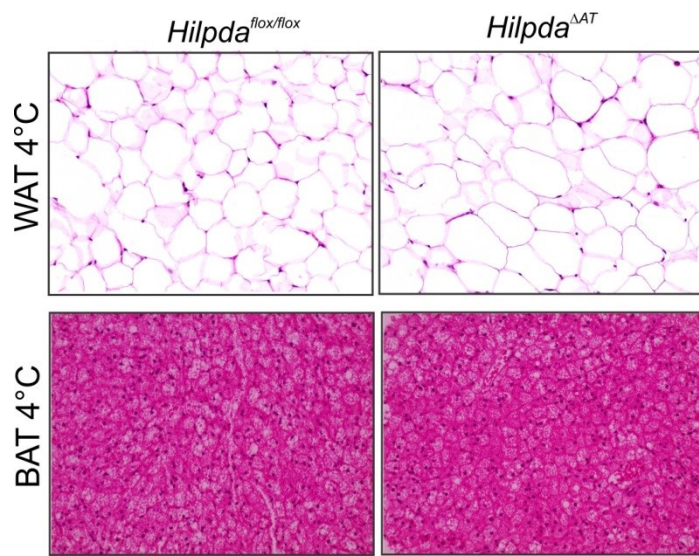

**Supplemental Figure 3.** Representative H&E stainings of epididymal WAT and BAT of *Hilpda*<sup>flox/flox</sup> and *Hilpda*<sup>ΔAT</sup> mice exposed to 4°C or 28°C for 10 days.
